# Supplementary material for: Transforming growth factor beta type 1 (TGF-β) and hypoxia-inducible factor 1 (HIF-1) transcription complex as master regulators of the immunosuppressive protein galectin-9 expression in human cancer and embryonic cells
Source: publisher site journal article supplement (doi:10.18632/aging.202343), 2020-12-08
Supplement: Supplementary file [file aging-v12i23-202343-supplementary-material-SD1.pdf]

SUPPLEMENTARY FIGURES

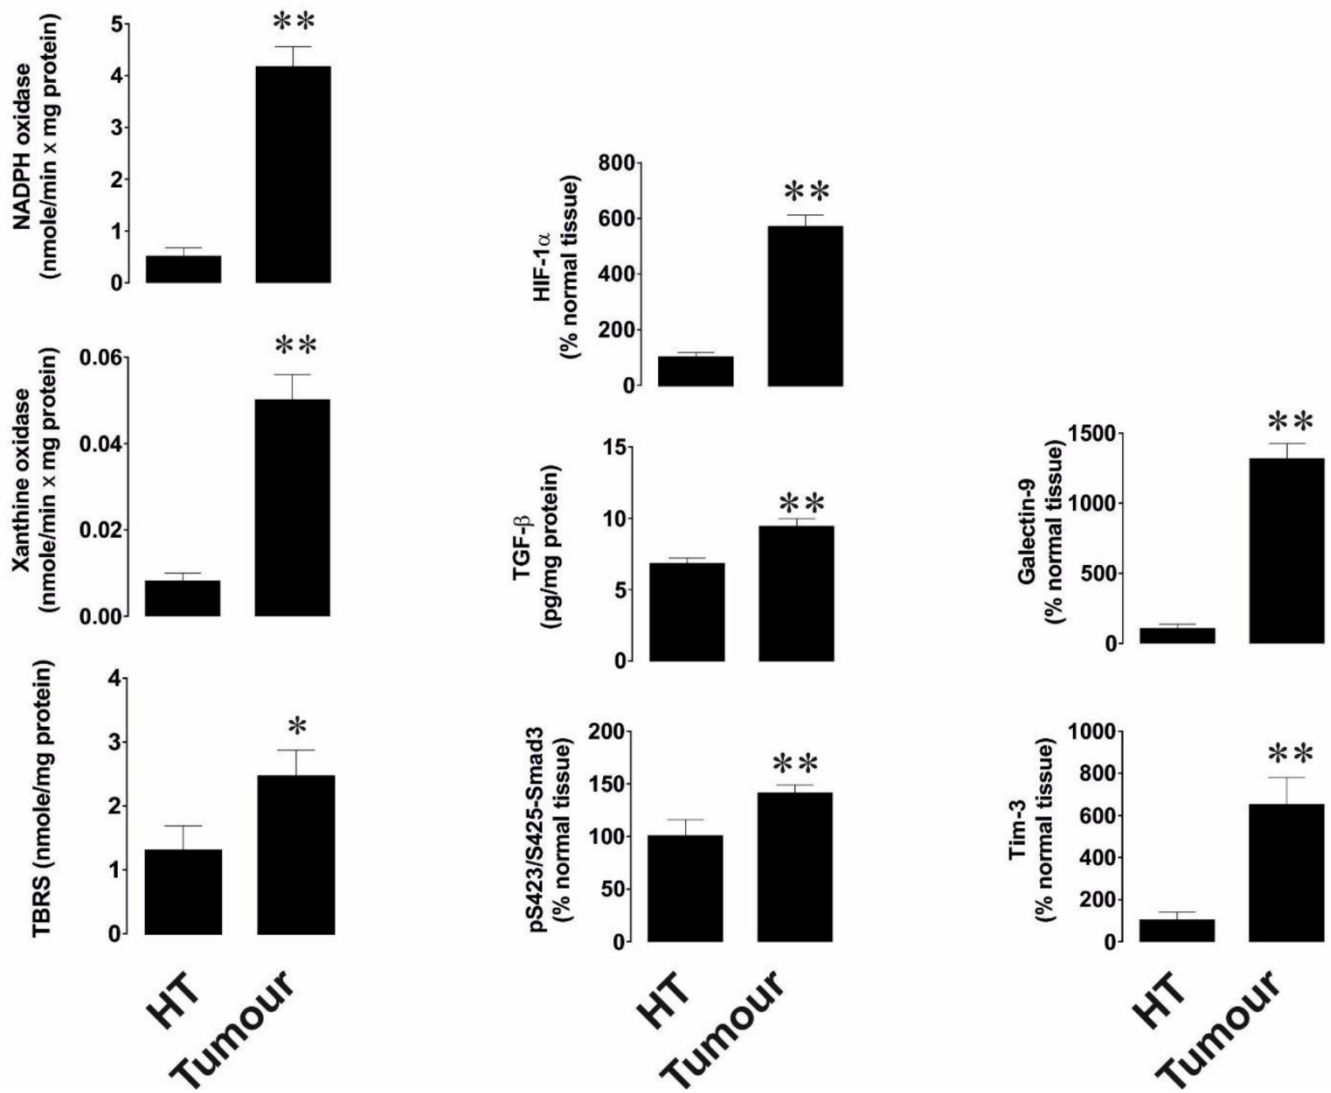

Supplementary Figure 1. Values presented in Figure 1 normalised against total protein loaded for Western blot data and per 1 mg of total tissue protein for enzyme activity and TBRS assays. Data are shown as mean values  $\pm$  SEM of five independent experiments. \* -  $p < 0.05$  and \*\* -  $p < 0.01$  vs non-transformed peripheral tissue abbreviated as HT (healthy tissue).

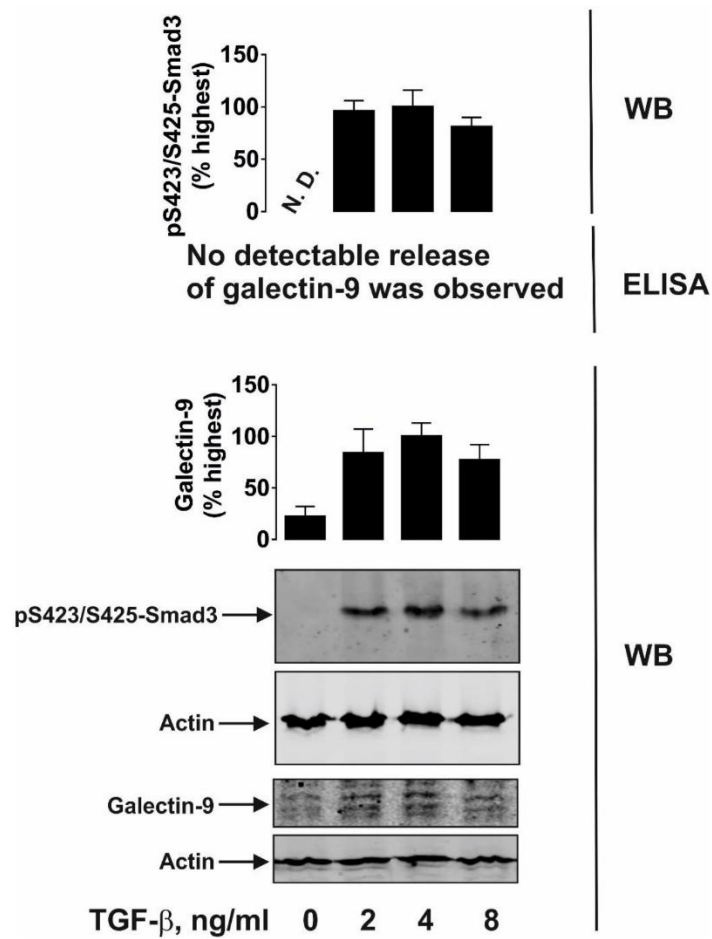

**Supplementary Figure 2. TGF- $\beta$  induces galectin-9 expression in K562 human cancer cells.** K562 human chronic myeloid leukaemia cells were exposed for 24 h to 2, 4 or 8 ng/ml TGF- $\beta$  followed by detection of phospho-S423/S425-Smad3 and galectin-9 expression by Western blot. Galectin-9 release was analysed by ELISA. Images are from one experiment representative of three which gave similar results. Data are shown as mean values  $\pm$  SEM of three independent experiments.
